# Supplementary material for: Preparation of long supramolecular carbon nanotubes
Source: Royal Society of Chemistry journal article supplement (doi:10.1039/c3nj41156g), 2013-01-01
Supplement: c3nj41156g.pdf [file c3nj41156g.pdf]

## Supporting Information

### Preparation of Long Supramolecular Carbon Nanotubes

Mohsen Adeli\*, Ebrahim Mehdipour, Siamak Beyranvand

Department of Chemistry, Faculty of Science, Lorestan University, Khoramabad, Iran

#### *Shortening of MWCNTs*

MWCNTs were purified and shortened according to reported procedures in literature [1]. Briefly, MWCNTs (2 g) were added to 40 ml of sulfuric/nitric acid mixture (3:1) in a reaction flask and refluxed for 24 h at 120 °C. The mixture was cooled and diluted by distilled water and then it was filtrated. The product (SCNTs) was washed by distilled water and dried at 60 °C for 3 h by vacuum oven.

#### *Preparation of ABA type linear-dendritic copolymers containing PEG as B block and PAMAM with periphery amino functional groups as A blocks (LDNH<sub>2</sub>)*

For preparation of linear-dendritic copolymer, first polyethyleneglycol was functionalized by triazine. A solution of polyethylene glycol (4 g) and sodium hydroxide (0.32 g) in 10 mL of water was added to a solution of cyanuric chloride (3.69 g) in 50 mL dichloromethane at 0 °C. Mixture was stirred at 0 °C for 1 h, and then it was stirred at room temperature for 1 h and finally was refluxed for additional 6 h. Then mixture was cooled and filtered off and solvent was evaporated. The crude product was dissolved in 10 mL dichloromethane and was precipitated in diethyl ether at 0 °C several times. The purified product was obtained as a white solid. Therefore it was reacted with ethylenediamine and was used as core for synthesizing PAMAM blocks according to reported procedure in literature [2] (scheme 1).

#### *Preparation of ABA type linear-dendritic copolymers containing PEG as B block and PAMAM with aromatic functional groups as A blocks (LDAr)*

In order to synthesis LDAr, ligand (2- chloro 4,6- di phenoxy- 1,3,5- triazine) (compound A) was synthesized by using reaction between cyanuric chloride and phenol in the presence of sodium hydroxide according to reported procedures in literature [3].

Then a solution of LDNH<sub>2</sub> (2 g) in 5 mL of dry methanol was added to a solution of compound A (1.82 g) in 10 mL of dry dichloromethane, dropwise at 0 °C. Mixture was stirred at room temperature for 1 h and then was refluxed for additional 12 h. Mixture was cooled

and filtered off and product was dissolved in 5 mL methanol and then it was precipitated in diethyl ether. Purified compound was obtained as a dark brown viscose solid. (scheme 2).

#### *Preparation of palladium complex of LDAr (LDAr-Pd)*

For preparation of these linear-dendritic copolymers, first was synthesized of  $\text{Pd}(\text{CH}_3\text{CN})_2\text{Cl}_2$  complex. Therefore 0.1g (0.56 mmol) of  $\text{PdCl}_2$  with 35ml acetonitril was refluxed for 1 h was cooled and solution was obtained as a orange solution. Then insitu added to 1.2g (1.1mmol) LDAr. Mixture was stirred at room temperature for 24 h then was filtered off. The crude precipitation was washed in acetonitril for several times. Purified compound was obtained as a yellow solid. (scheme 3).

#### *Preparation of Pd bis [(2- chloro 4,6 di naphtoxy- 1,3,5- triazine)]<sub>2</sub>Cl<sub>2</sub> (Ligand X).*

First ligand 2-chloro-4,6-di naphtoxy-1,3,5- triazine (compound B) was synthesized by using reported procedure in literature [3].  $\text{Pd}(\text{CH}_3\text{CN})_2\text{Cl}_2$  was added to 0.36 g (1.1 mmol) of compound B and mixture was stirred at room temperature for 24 h and then it was filtered off. Crude product was washed by acetonitril several times and final product was obtained as a light brown solid.

#### *Preparation of LDCNTs*

For preparation of LDCNTs ,0.1 g of opened CNT was added to an aqueous solution of LDAr (0.1 g in 10 ml water) or LDAr-Pd and it was sonicated for 5 minutes at room temperature. Then solution was stirred at room temperature over night. The solution was filtered and centrifuged to precipitate the final product.

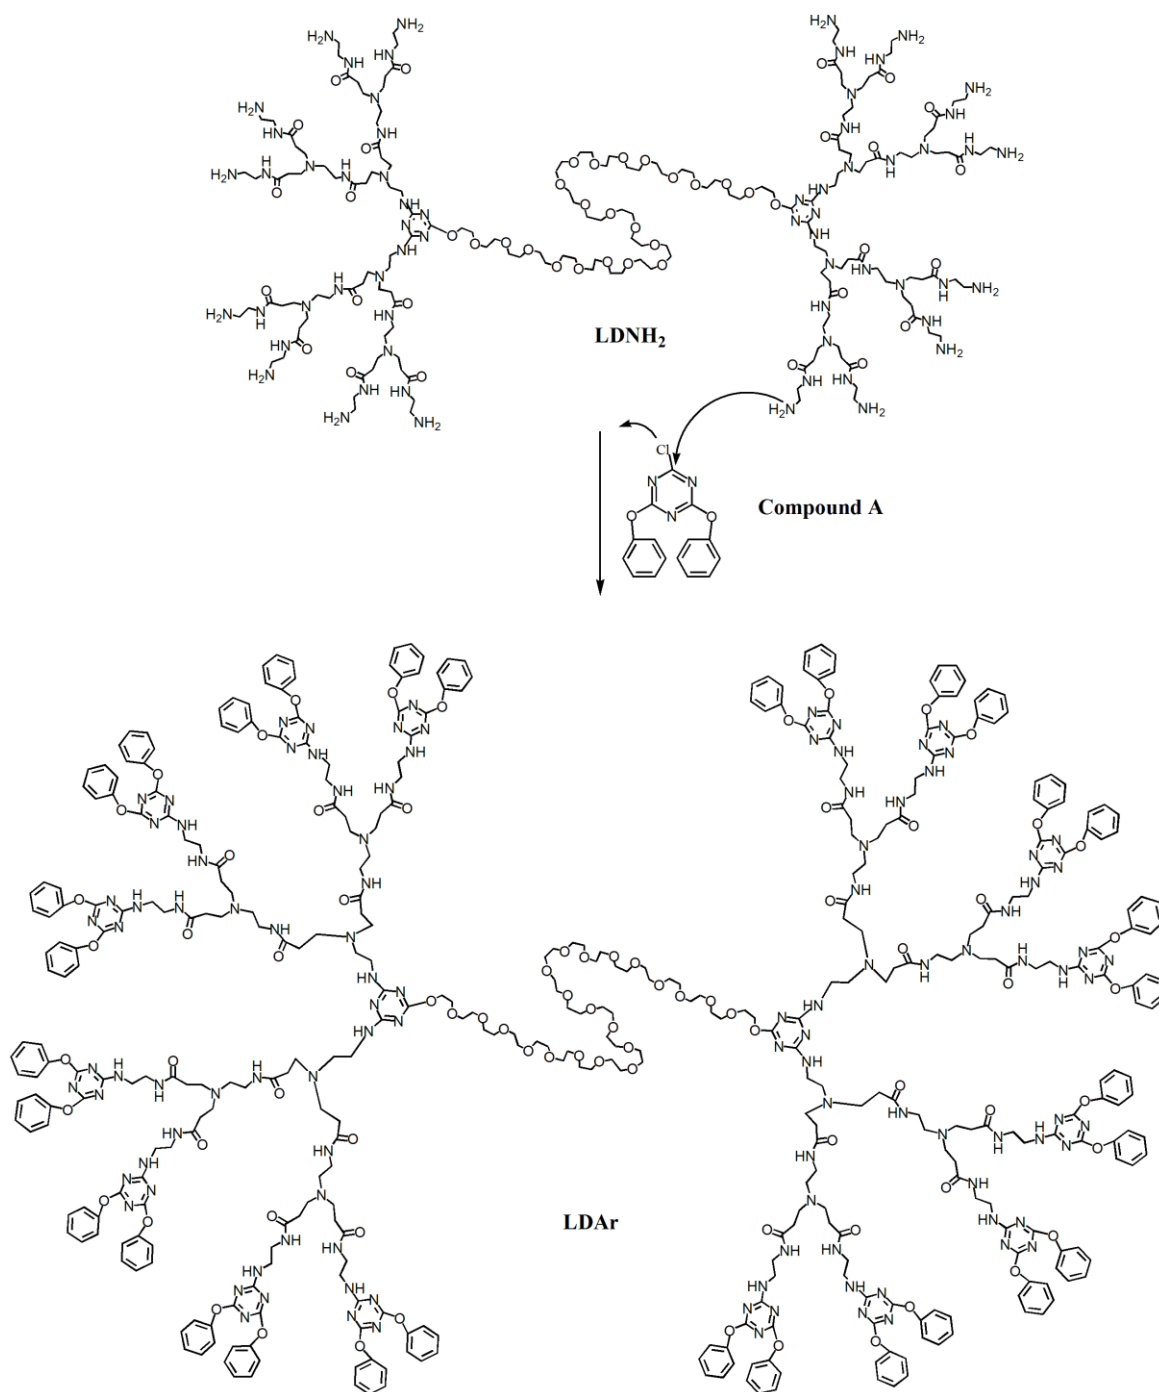

**Scheme S11.** ABA type linear-dendritic copolymers containing periphery a) amino and b) aromatic groups.

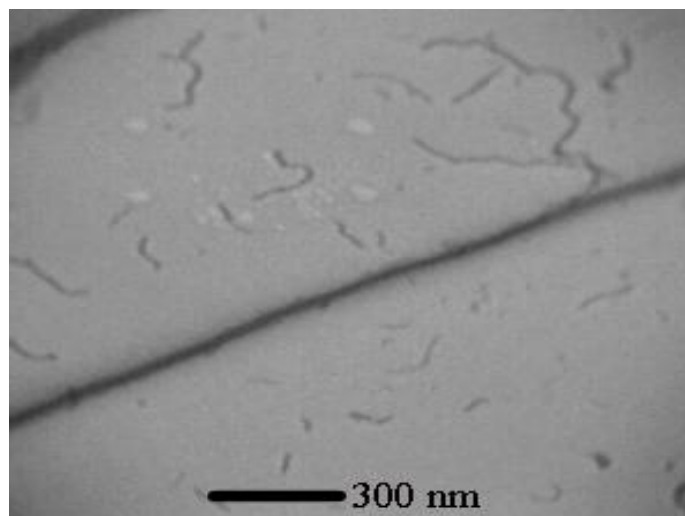

**Figure SI1.** TEM image of pristine MWCNTs after refluxing in acid and purification process (SCNTs).

SEM images show a network-like assembly for SCNTs interacted with the LDNH<sub>2</sub>. Diameter of SCNTs shielded by linear-dendritic copolymers is around 50 nm. Since diameter of pristine SCNTs is 25-30 nm, diameter of assembled linear-dendritic copolymers onto the surface of carbon nanotubes is 25 nm.

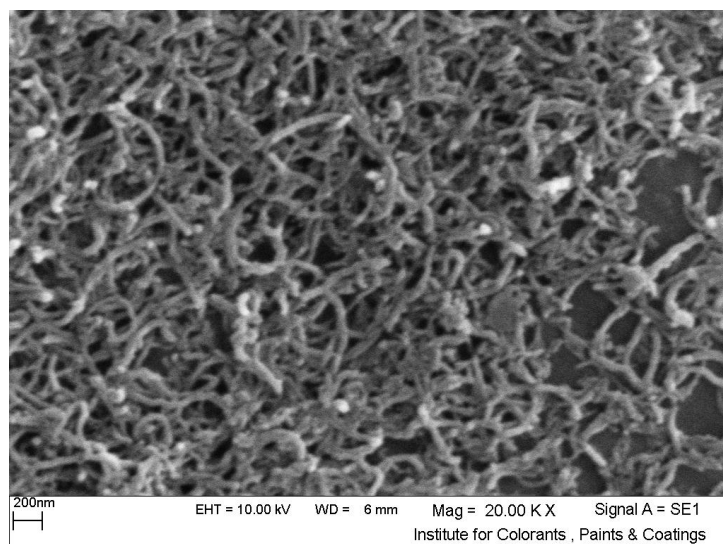

**Figure SI2.** SEM images of SCNTs interacted with LDNH<sub>2</sub> noncovalently.

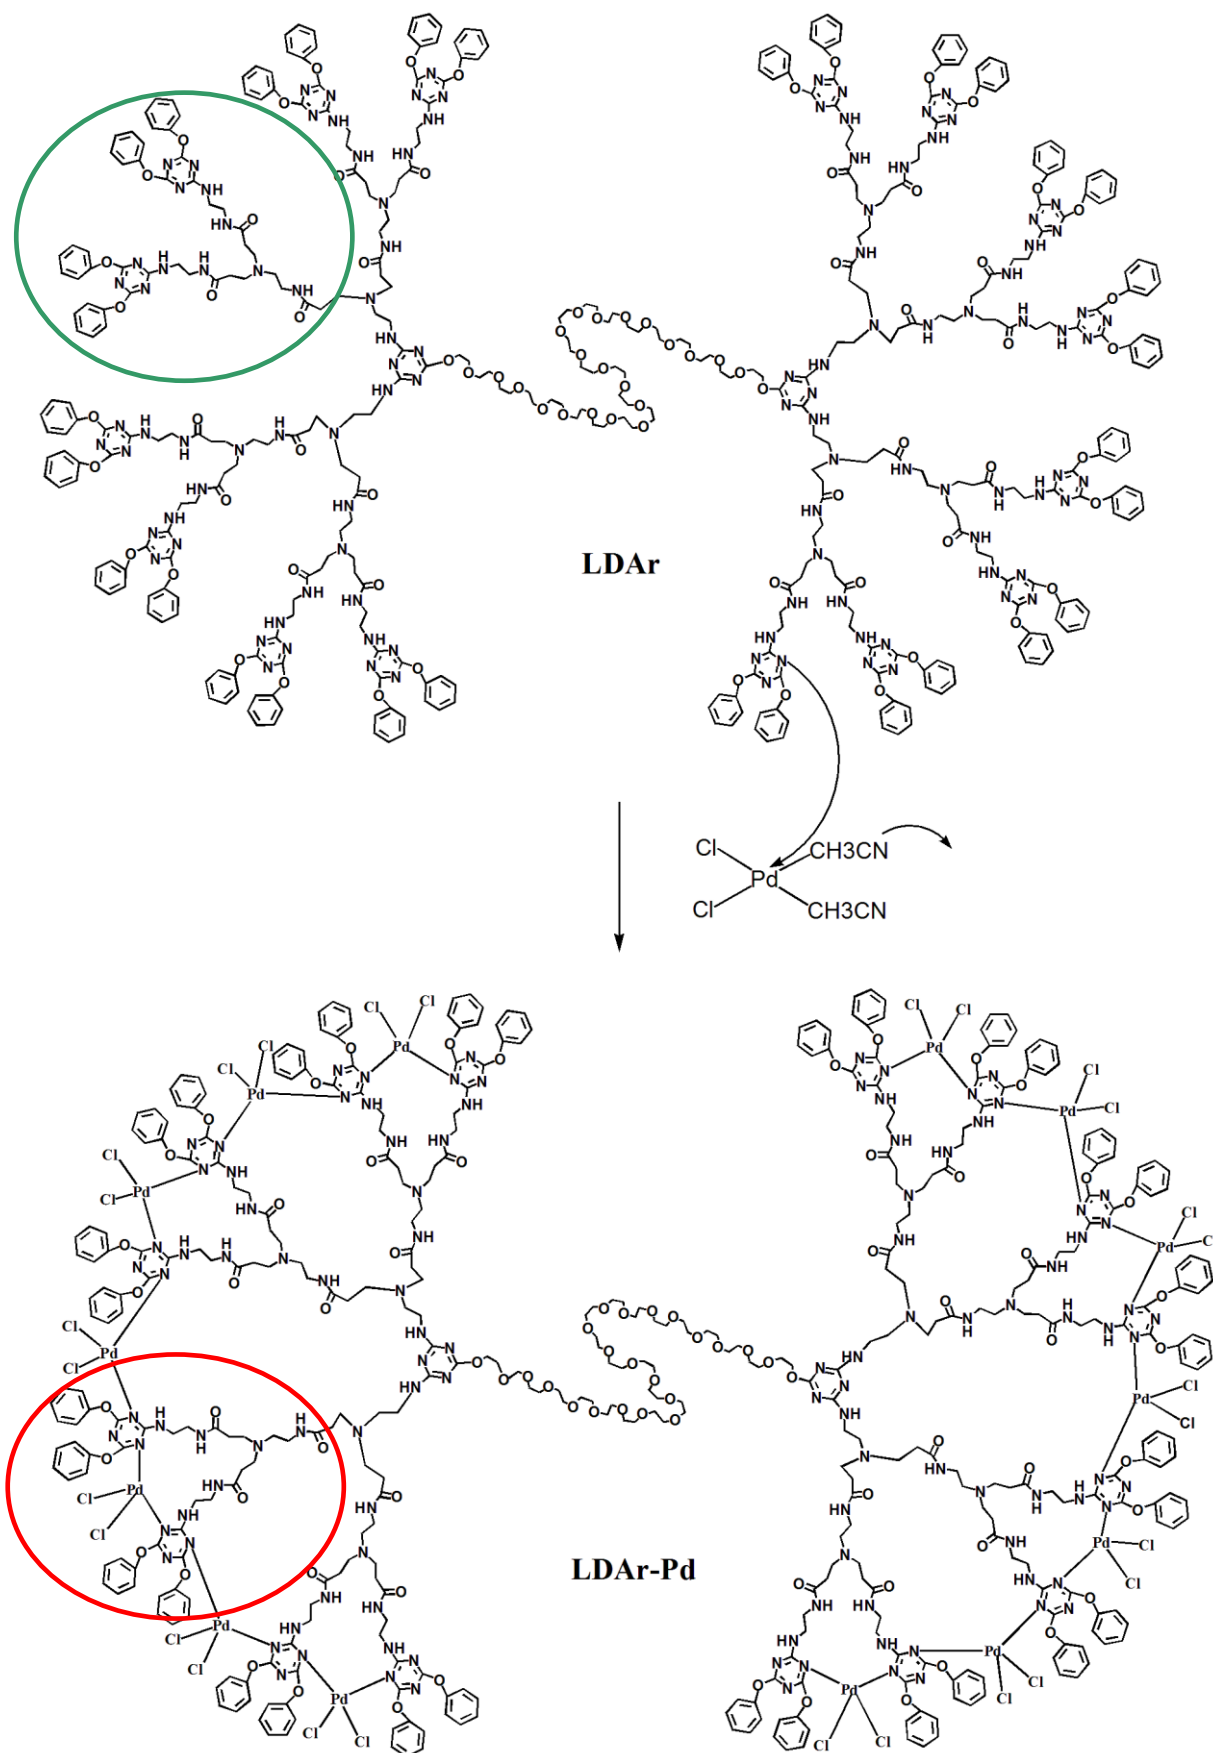

**Scheme SI2.** Reaction between hetero atoms of dendritic blocks of LDAr and palladium chloride to produce a complex with planar and rigid aromatic domains.

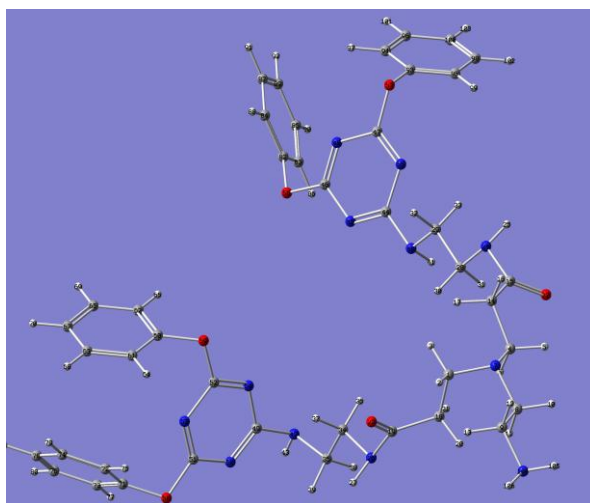

**Figure SI3.** Three dimensional structure for highlighted part of LDAr in scheme SI2 (green circle).

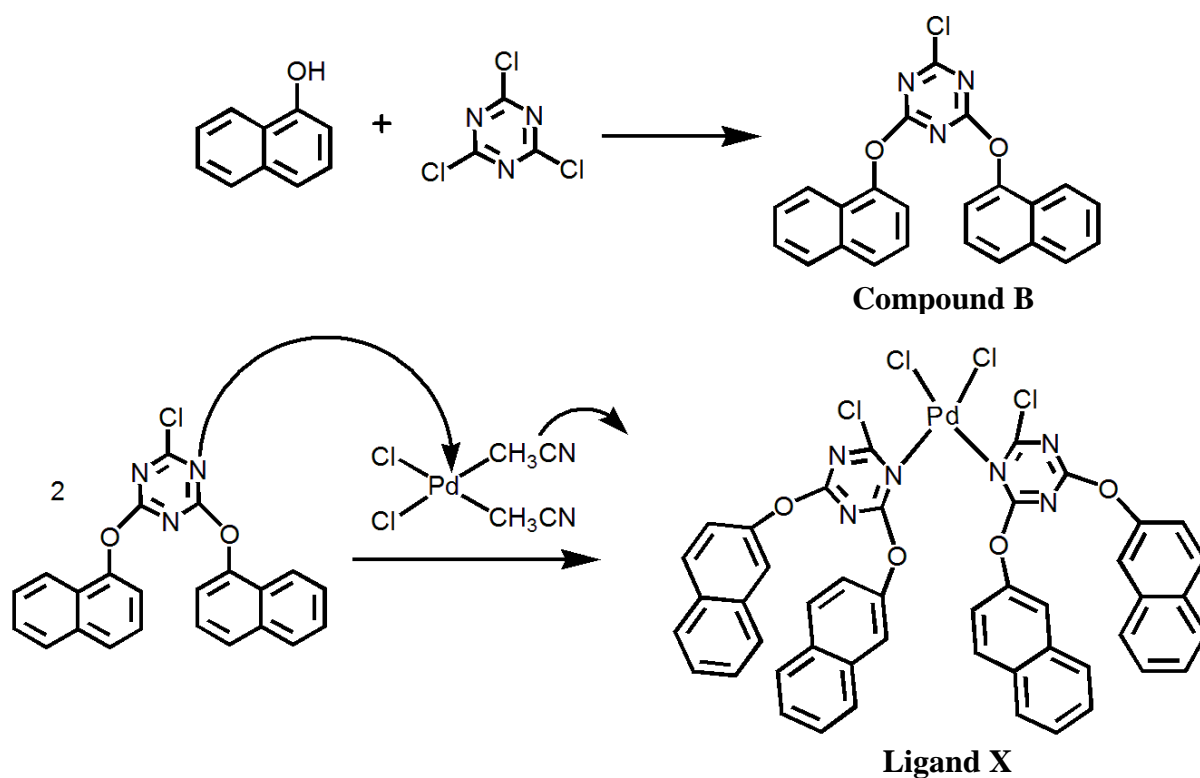

**Scheme 3.** Synthesis of palladium complex of 2-chloro 4,6-di Naphthoxy-1,3,5-triazine.

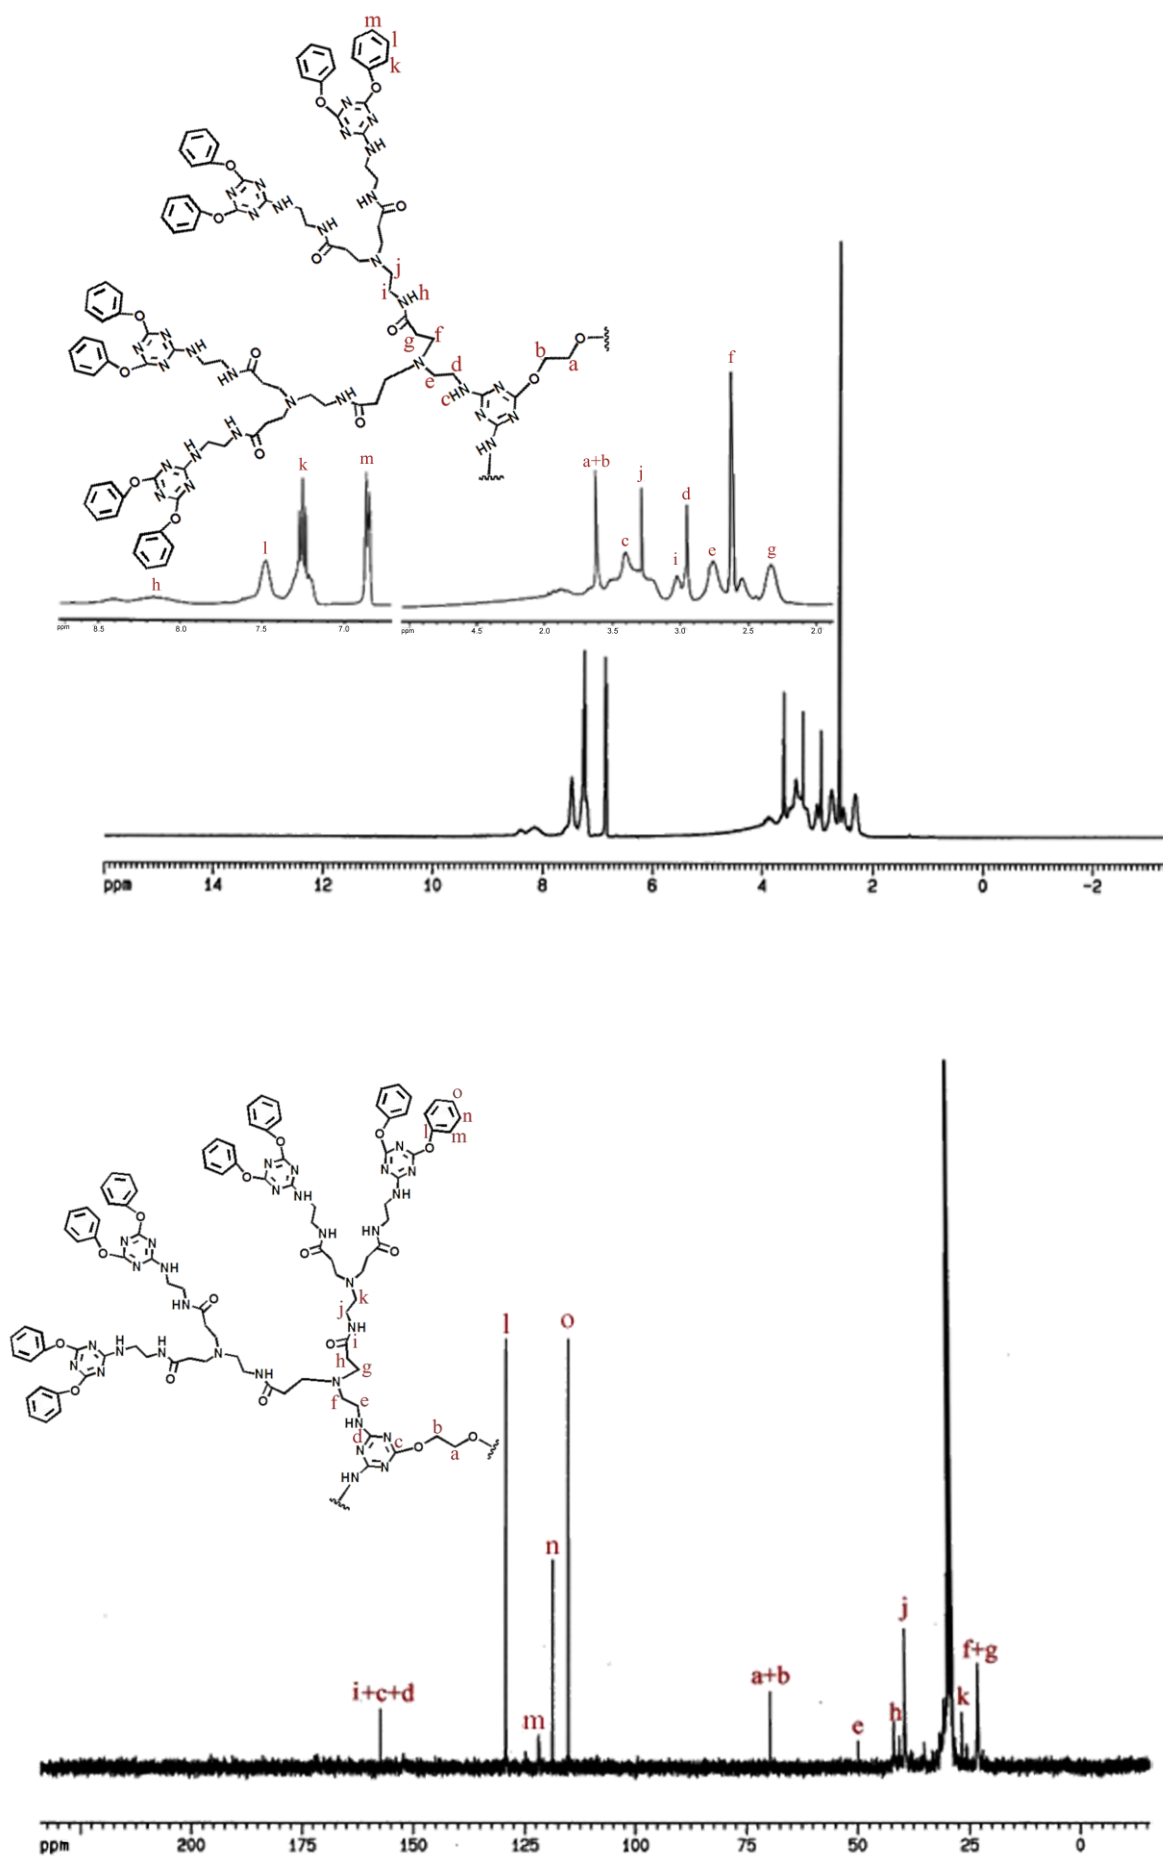

**Figure SI4.**  $^1\text{H}$ ,  $^{13}\text{C}$  NMR spectra of LDAr.

The integral ratio of aliphatic protons of PEG to the aromatic part of the LDAr is 1.8 (in comparison to 1.7 as a theoretical calculation). This is an evidence, which shows growth of linear-dendritic copolymer has been accomplished completely (Figure SI6).

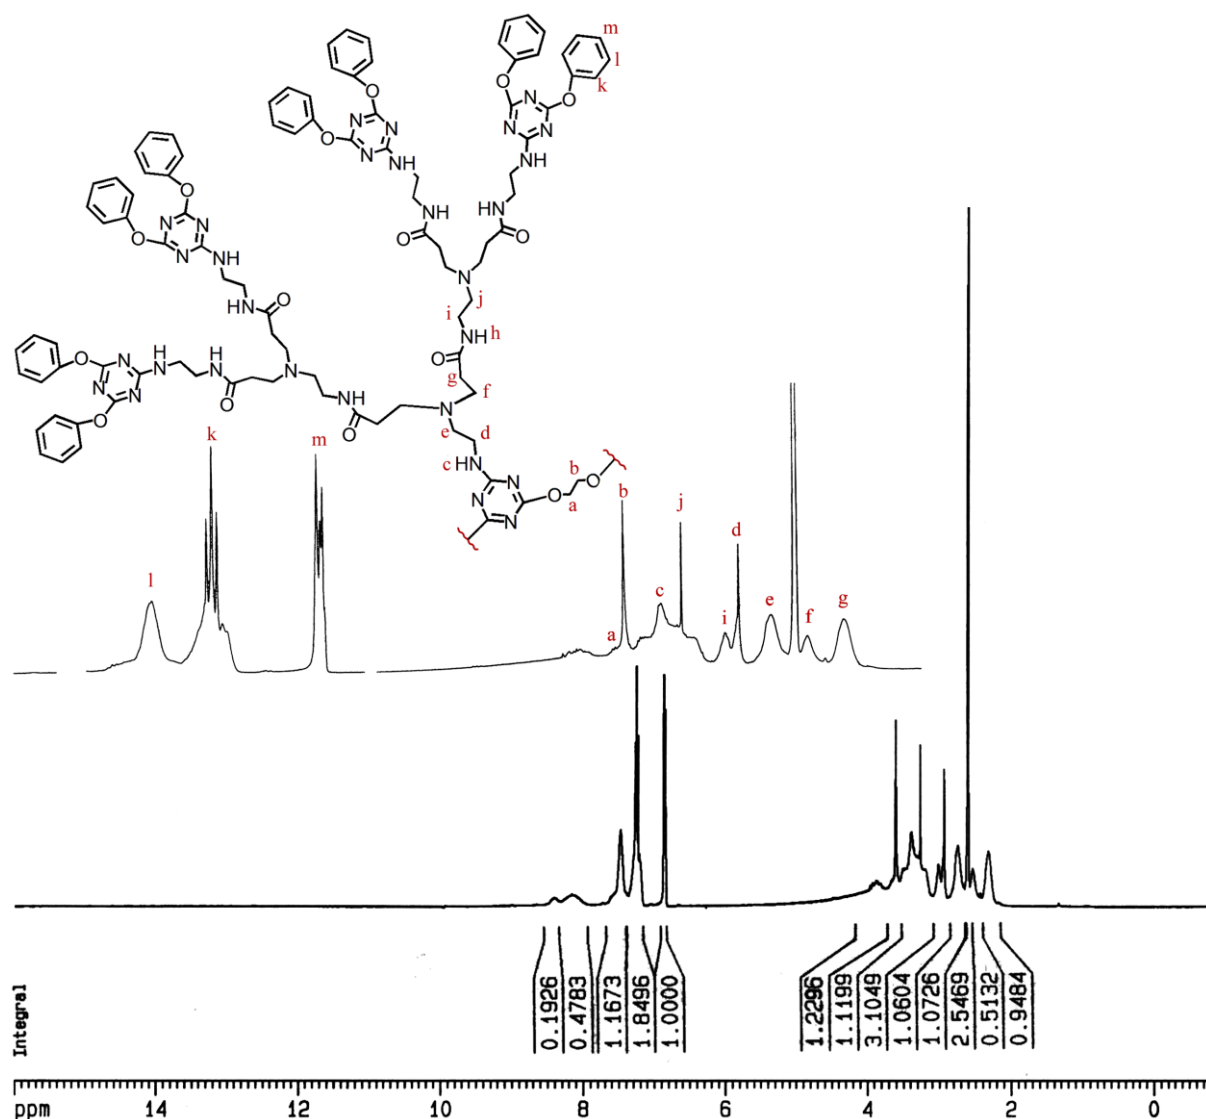

**Figure SI5.** The integral ratio of protons of polyethylene glycol to aromatic end groups is in agree with the calculated ratio.



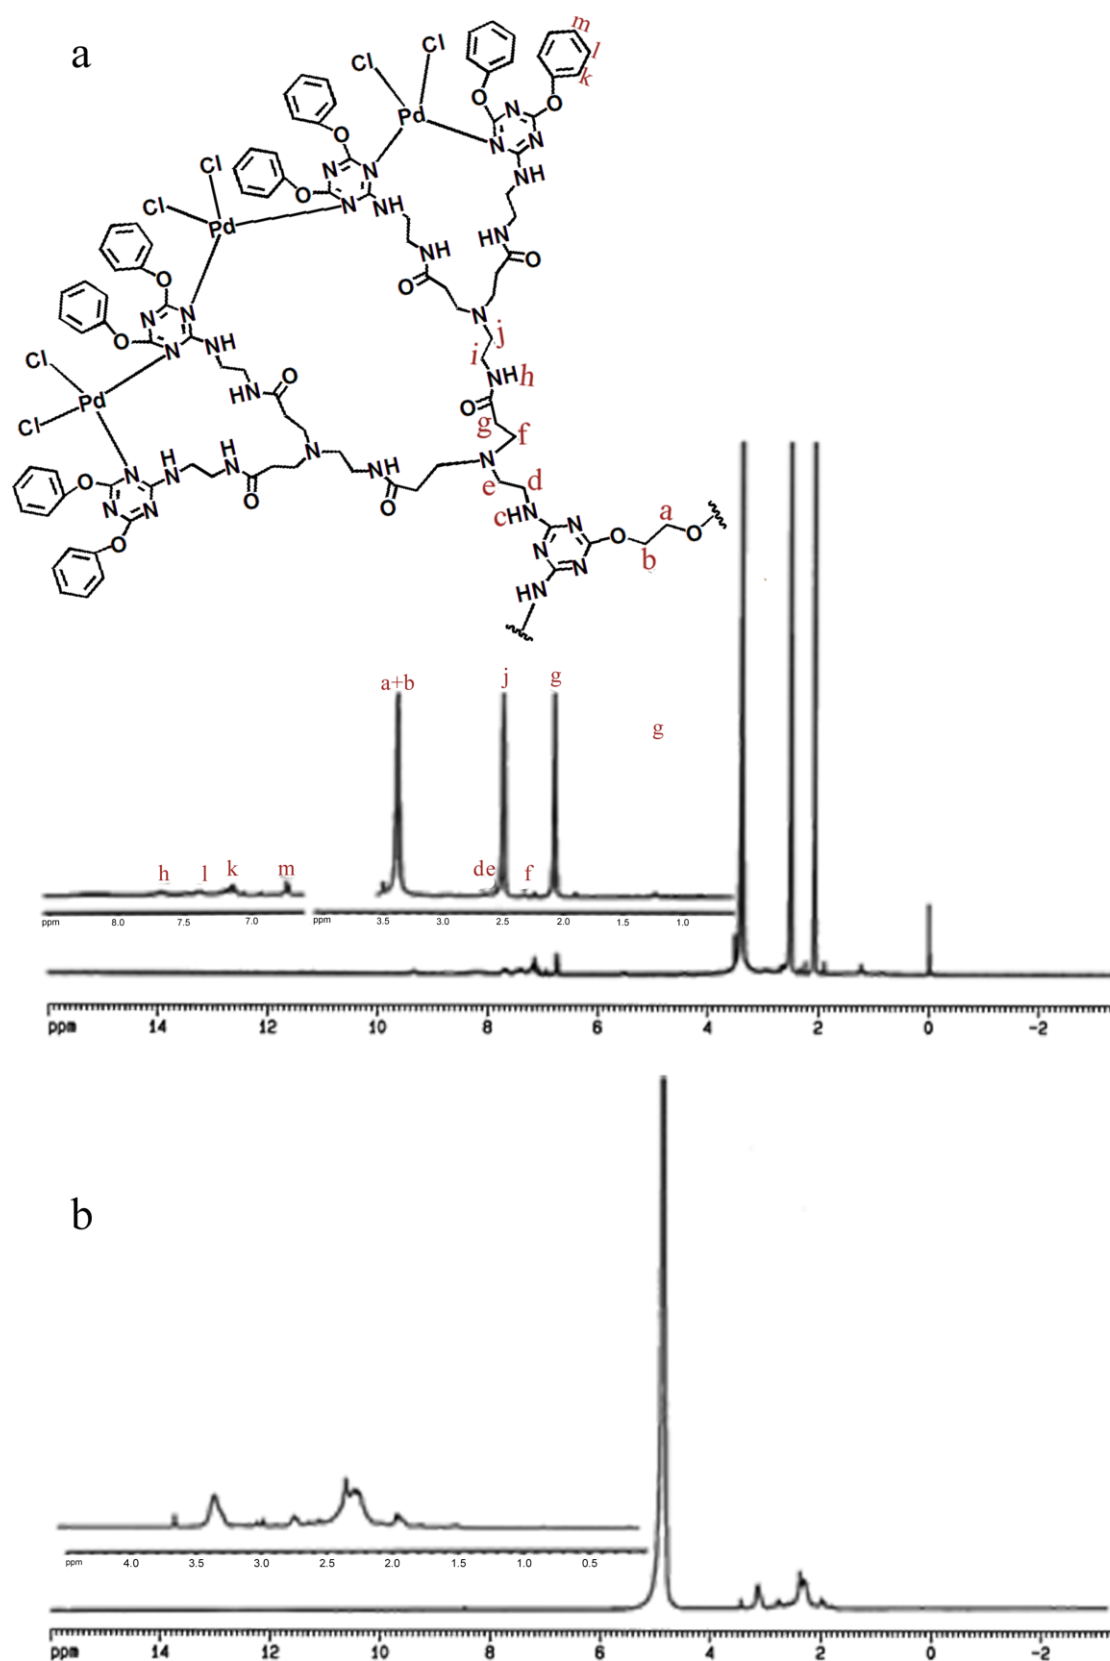

**Figure SI6.**  $^1\text{H}$  NMR spectra of a) LDCNT b) LDCNT-Pd/CNT (LDCNTs).

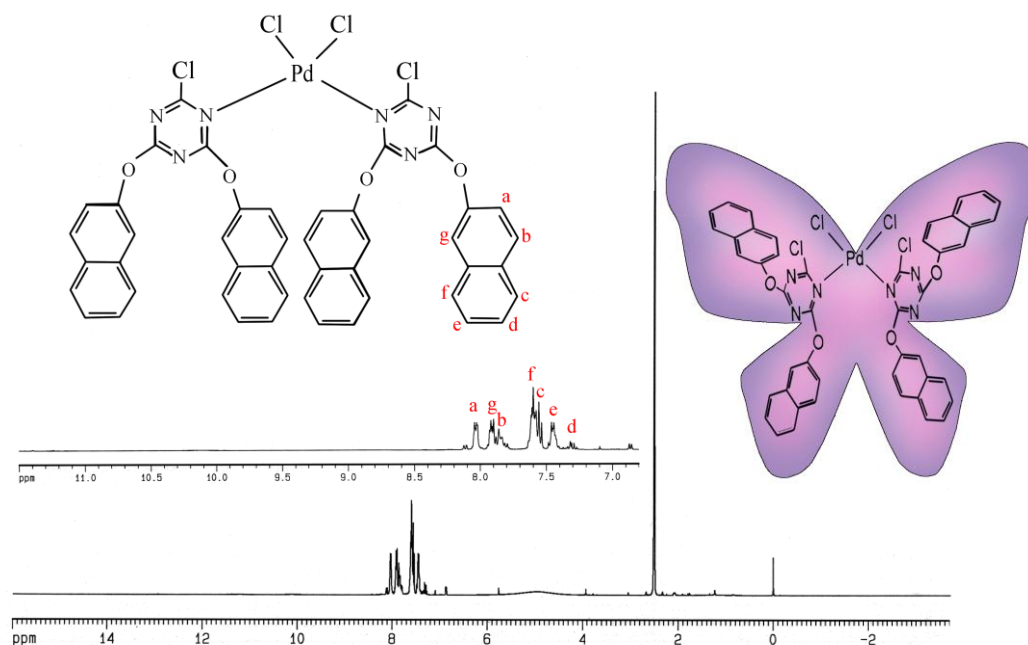

**Figure SI7.**  $^1\text{H}$  NMR spectra of Ligand X.

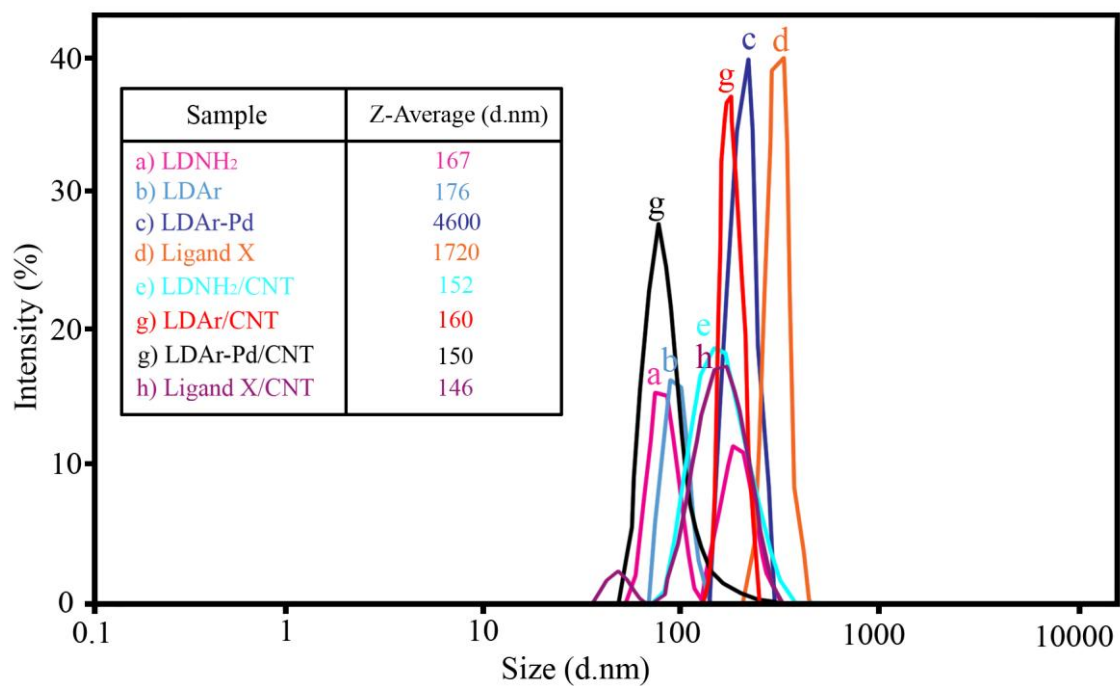

**Figure SI8.** DLS diagrams of ligands and linear-dendritic copolymers used in this research work.

| Sample       | Zeta Potential(mV) |
|--------------|--------------------|
| LDAr-Pd      | -0.941             |
| Ligand X     | -0.557             |
| LDAr-Pd/CNT  | -6.21              |
| Ligand X/CNT | -7.01              |

**Figure SI9.** Zeta potential of LDAr-Pd, ligand X, LDAr-Pd/CNT, Ligand X/CNT.

#### References:

- [1] Adeli, M.; Bahari, A.; Hekmatara, H. *NANO: Brief Reports and Reviews*. **2008**, 3, 37-44.
- [2] Kim, T.; See, H.; Ch. J.; Jang, H-S.; et al. *Biomacromolecules*. **2004**, 5, 2487-2492.
- [3] Namazi, H.; Adeli, M. *polymer*. **2005**, 46, 10788–10799.
